# Supplementary material for: Analyses of selected safety endpoints in phase 1 and late-phase clinical trials of anti-PD-1 and PD-L1 inhibitors: prediction of immune-related toxicities
Source: PubMed Central journal article supplement (PMC5620211; doi:10.18632/oncotarget.18847), 2017-06-29
Supplement: oncotarget-08-67782-s001.pdf [file oncotarget-08-67782-s001.pdf]

## **Analyses of selected safety endpoints in phase 1 and late-phase clinical trials of anti-PD-1 and PD-L1 inhibitors: prediction of immune-related toxicities**

### **SUPPLEMENTARY MATERIALS**

**Supplementary Table 1: Late-phase studies included in the analysis**

See Supplementary File 1

Supplementary Table 2: Matched-phase 1 clinical trials included in the analysis

| PMID     | Author year                      | Patient population                                                 | Number of patients evaluable for toxicity | Number of dose levels | Dose levels                                                           | MTD          | RP2D         | DLT           | Four most common adverse events                   |
|----------|----------------------------------|--------------------------------------------------------------------|-------------------------------------------|-----------------------|-----------------------------------------------------------------------|--------------|--------------|---------------|---------------------------------------------------|
| 25428503 | Powels <i>et al.</i>             | Bladder UC                                                         | 68                                        | 1                     | Atezolizumab 15 mg/kg every 3 weeks                                   | NA           | NA           | NA            | Decreased appetite, fatigue, nausea, and pyrexia  |
| 22658127 | Topollian <i>et al.</i> 2.(2012) | Multiple histologies (solid tumors only)                           | 296                                       | 5                     | Nivolumab 0.1, 0.3, 1, 3 and 10 mg/Kg every 2 weeks                   | Not reached  | Not reported | Not reported  | Fatigue, rash, diarrhea, and pruritus             |
| 25891174 | Garon <i>et al.</i>              | NSCLC                                                              | 495****                                   | 3                     | Pembrolizumab 2 or 10 mg/Kg every 3 weeks or 10 mg/kg every 2 weeks   | Not reported | Not reported | Not reported  | Fatigue, pruritus, decreased appetite, and rash   |
| 25428504 | Herbst <i>et al.</i> (2014).     | Multiple histologies (solid tumors only)                           | 277                                       | 8                     | Atezolizumab 0.01-20 mg/Kg every 3 weeks                              | Not reached  | Not reported | None observed | Fatigue, decreased appetite, nausea and pyrexia   |
| 25034862 | Robert <i>et al.</i> (2014)      | Melanoma                                                           | 173****                                   | 2                     | Pembrolizumab 2 and 10 mg/Kg every 3 weeks                            | Not reported | Not reported | Not reported  | Fatigue, pruritus, rash, and diarrhea             |
| 25897158 | Gattinger <i>et al.</i> (2015)   | NSCLC                                                              | 129***                                    | 3                     | Nivolumab 1, 3 and 10 mg/Kg every 2 weeks                             | Not reached  | Not reported | Not reported  | Fatigue, decreased appetite, and diarrhea         |
| 25977344 | Patnaik <i>et al.</i> (2015)     | Multiple histologies (solid tumors only)                           | 30                                        | 5                     | Pembrolizumab 1,3,10 mg/Kg every 2 weeks and 2,10 mg/kg every 3 weeks | Not reached  | Not reported | None observed | Fatigue, nausea, pruritus, and decreased appetite |
| 25800770 | McDormett <i>et al.</i> (2015)   | Advanced refractory RCC                                            | 34                                        | 2                     | Nivolumab 1 mg/Kg or 10 mg every 2 weeks                              | Not reached  | Not reported | Not reported  | Fatigue, rash, pruritus, and diarrhea             |
| 24145345 | Weber <i>et al.</i> (2013)       | Advanced melanoma 2 <sup>nd</sup> line after ipilimumab            | 41**                                      | NA                    | Nivolumab 3mg/Kg every 2 weeks                                        | NA           | NA           | Grade 3 rash  | Fatigue, rash, pruritus, and diarrhea             |
| 24590637 | Topalian <i>et al.</i>           | Advanced melanoma (1 to 5 <sup>th</sup> previous lines of therapy) | 107                                       | 5                     | Nivolumab 1 mg-10 mg/Kg every 2 weeks                                 | Not reached  | Not reported | Not reported  | Fatigue, rash, diarrhea, and pruritus             |

\* There was a maintenance phase in this trial which is not described here due to space constraints. Maximum tolerated dose (MTD), Not applicable (NA), non-small cell lung cancer (NSCLC), recommended phase 2 dose (RP2D), urothelial carcinoma (UC).

\*\* Only cohort analyzed was the one treated with nivolumab monotherapy and human leukocyte antigen (HLA) unrestricted.

\*\*\* This is a dose expansion cohort with 3 dose levels from a dose-escalation phase 1 trial.

\*\*\*\* This is a randomized dose expansion cohort.
